# Supplementary material for: Biodegradation of highly crystallized poly(ethylene terephthalate) through cell surface codisplay of bacterial PETase and hydrophobin
Source: PubMed Central journal article supplement (PMC9681837; doi:10.1038/s41467-022-34908-z), 2022-11-21
Supplement: 41467_2022_34908_MOESM1_ESM.pdf [file 41467_2022_34908_MOESM1_ESM.pdf]

1 **Supplementary Information For**

2 Biodegradation of Highly Crystallized Poly(ethylene terephthalate) Through  
3 Cell Surface Codisplay of Bacterial PETase and Hydrophobin

4 Zhuozhi Chen <sup>1, #</sup>, Rongdi Duan <sup>1, #</sup>, Yunjie Xiao <sup>1, #</sup>, Yi Wei <sup>1, #</sup>, Hanxiao Zhang <sup>1</sup>,  
5 Xinzhao Sun <sup>1</sup>, Shen Wang <sup>1</sup>, Yingying Cheng <sup>1</sup>, Xue Wang <sup>1</sup>, Shanwei Tong <sup>1</sup>, Yunxiao  
6 Yao <sup>1</sup>, Cheng Zhu<sup>1</sup>, Haitao Yang <sup>1,2,3</sup>, Yanyan Wang <sup>1,\*</sup>, and Zefang Wang <sup>1,2,\*</sup>

7

8

9 \*Corresponding authors

10 **Email:** yanyanwang@tju.edu.cn (Yanyan W.); zefangwang@tju.edu.cn (Z.W.).

11

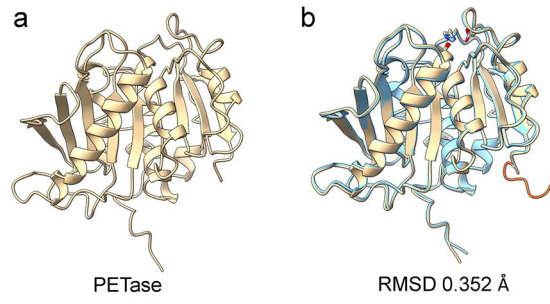

12

13 **Supplementary Fig. 1 (a)** The X-ray crystal structure of the native PETase. **(b)** Comparison of  
14 three-dimensional spatial structures of native PETase (yellow) and PETase-linker (cyan).

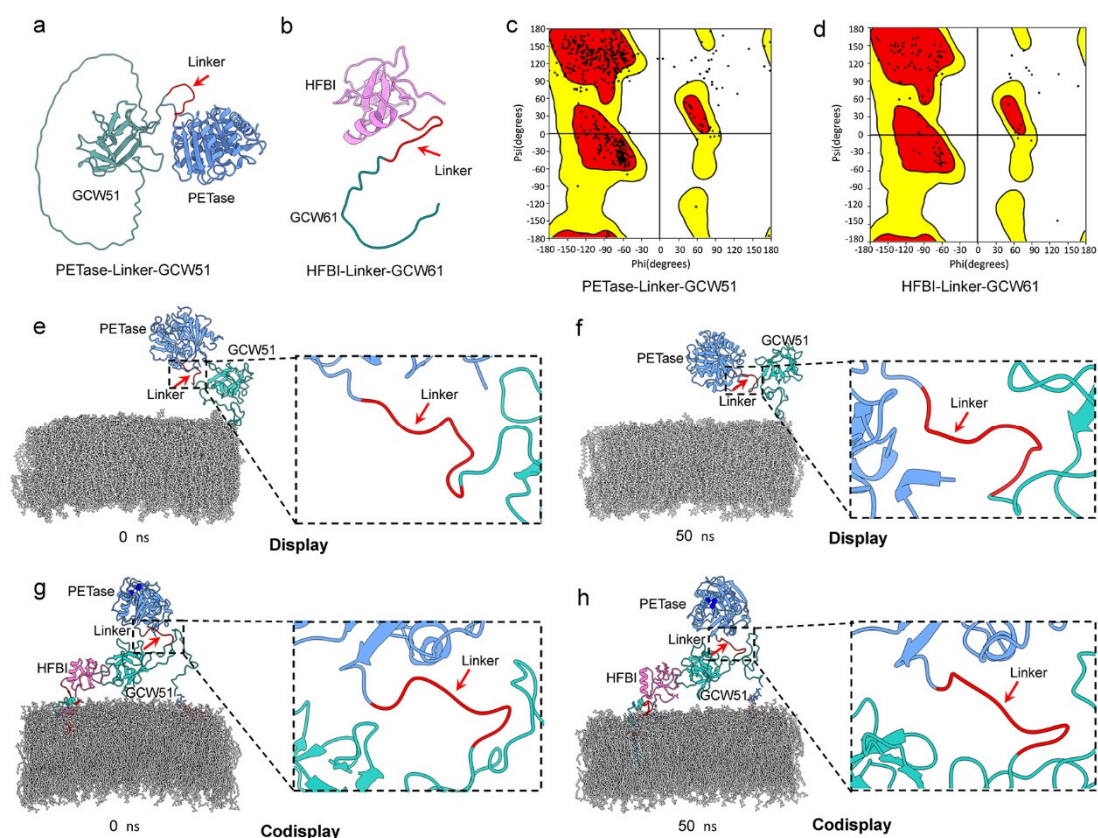

15

16 **Supplementary Fig. 2 MD studies for the codisplayed PETase and HFBI. Model for**  
 17 **PETase-Linker-GCW51 (a) and HFBI-Linker-GCW61 (b) were built with AlphaFold2. Each domain is**  
 18 **assigned a unique color. The Ramachandran plot of the PETase-Linker-GCW51 (c) and**  
 19 **HFBI-Linker-GCW61 (d) MD simulations of display system in 0 ns (e) and 50 ns (f) and Codisplay system**  
 20 **in 0 ns (g) and 50 ns (h). Each domain is assigned a unique color. The red arrow is marked as Linker.**

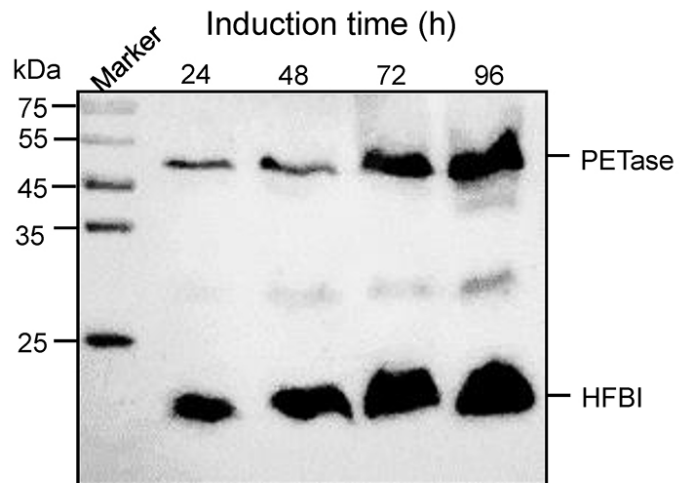

21

22 **Supplementary Fig. 3** Western blot analysis of GS115/PETase-HFBI. The experiment is repeated three  
23 times independently with similar results obtained. One representative is shown. Source data is provided as a  
24 Source Data file.

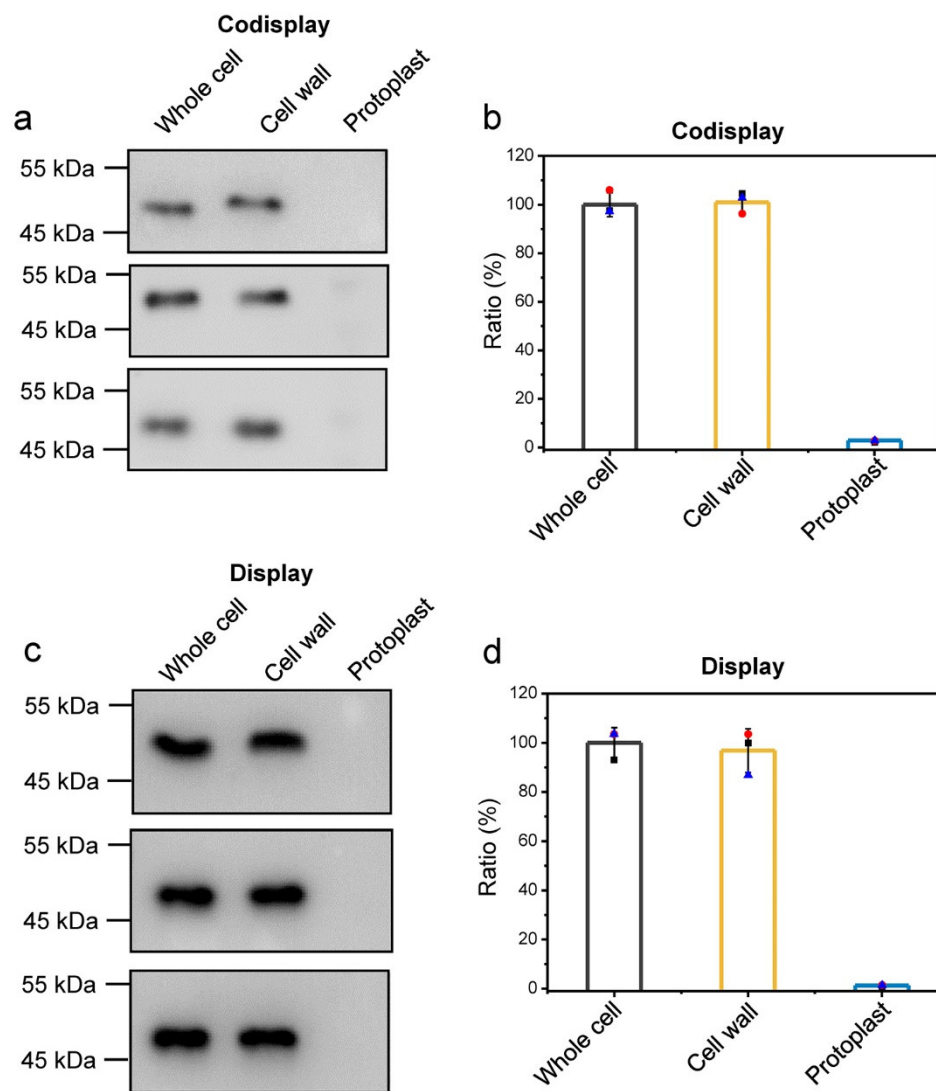

26 **Supplementary Fig. 4 Western blot analysis of various components for *P. pastoris***  
 27 **GS115/PETase-HFBI and GS115/PETase-GCW51. (a)** Western blot analysis of whole cell, cell wall and  
 28 protoplast for GS115/PETase-HFBI. (Protein Marker, M221-10, GenStar, Beijing, China) **(b)** Measurement  
 29 results of Western blot. **(c)** Western blot analysis of whole cell, cell wall and protoplast for  
 30 GS115/PETase-GCW51. **(d)** Measurement results of Western blot. Data are presented as mean values +/-  
 31 SD. The experiments are repeated three times independently with similar results obtained. One  
 32 representative is shown. The samples derive from the same experiment and that gels/blots are processed in  
 33 parallel. Source data are provided as a Source Data file.

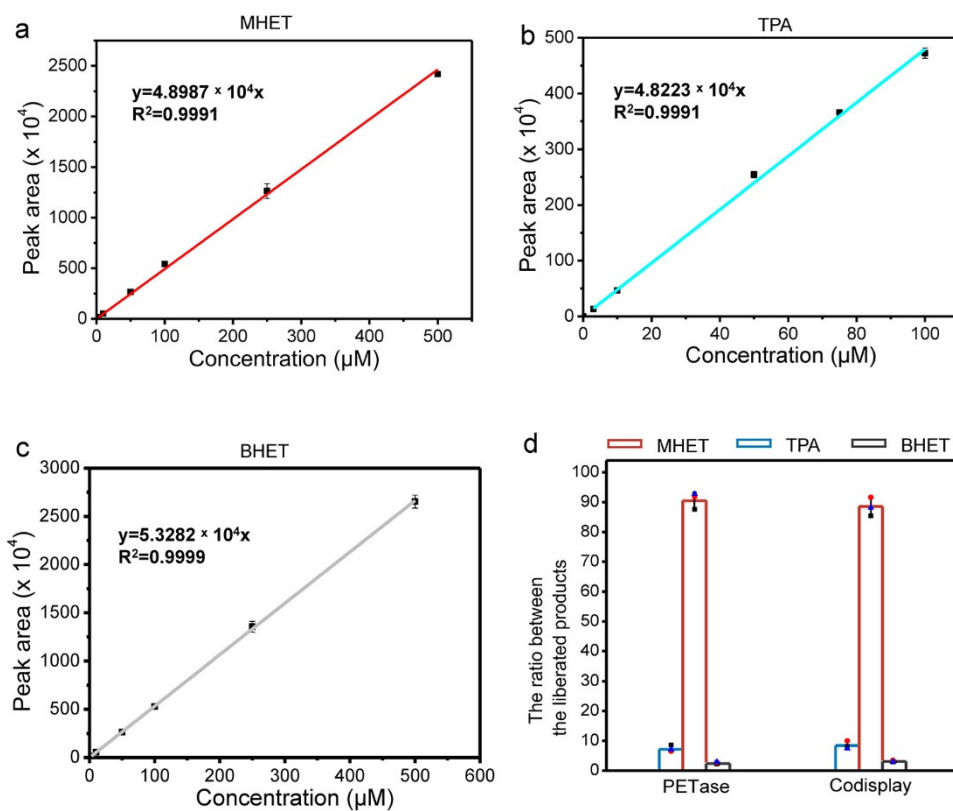

35 **Supplementary Fig. 5** Standard curves of MHET (a) TPA (b) and BHET (c). (d) The ratio between the  
36 liberated products of displayed PETase and that of the native PETase. All the experiments are repeated three  
37 times. Data are presented as mean values  $\pm$  SD. Source data are provided as a Source Data file.

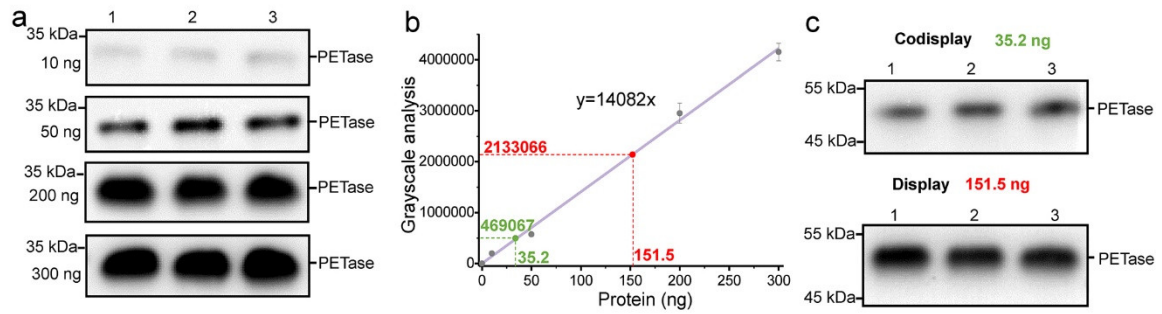

39 **Supplementary Fig. 6 The normalized cell number to protein concentration for facilitate comparison.**

40 **(a)** The PETase-grayscale analysis about 10 ng, 50 ng, 200 ng and 300 ng by western blot. **(b)** The

41 PETase-grayscale analysis standard curve. **(c)** PETase quantification was performed in  $2 \times 10^7$  cells of *P.*

42 *pastoris* GS115/PETase-HFBI and GS115/PETase-GCW51. All the experiments are repeated three times

43 independently with similar results obtained. Data are presented as mean values  $\pm$  SD. The samples derive

44 from the same experiment and that gels/blots are processed in parallel. Source data are provided as a Source

45 Data file.

46

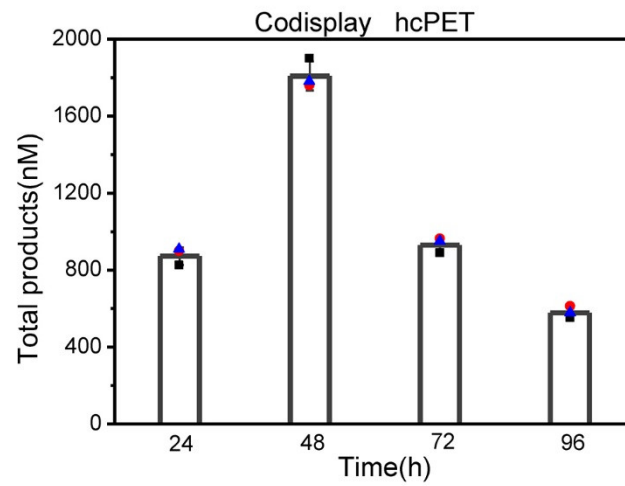

48 **Supplementary Fig. 7** The total products measurement for the codisplay degradation hcPET system at  
49 different induction time. n=3 independent experiments. Data are presented as mean values +/- SD. Source  
50 data are provided as a Source Data file.



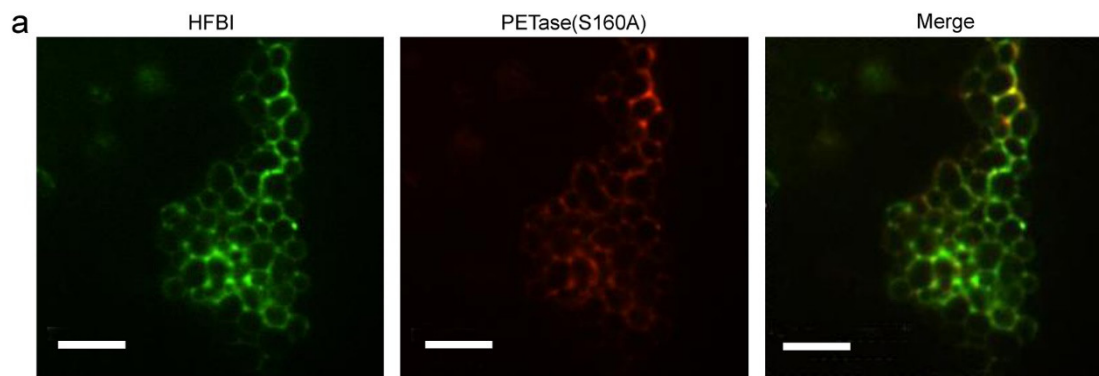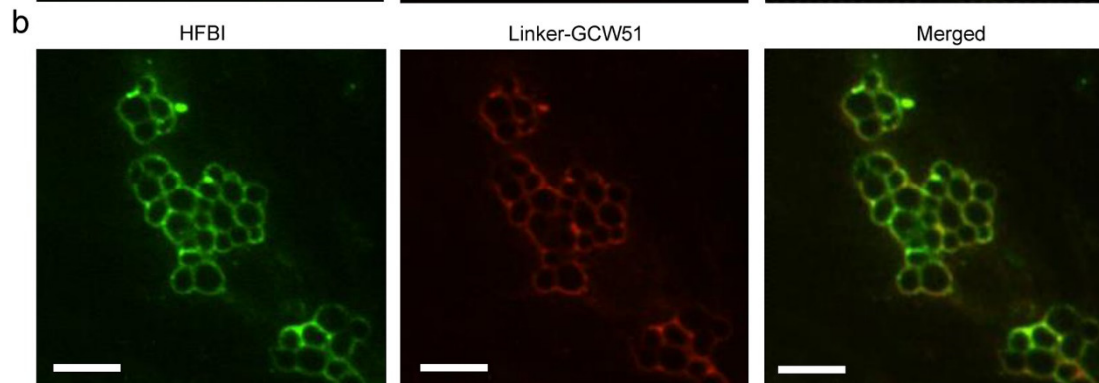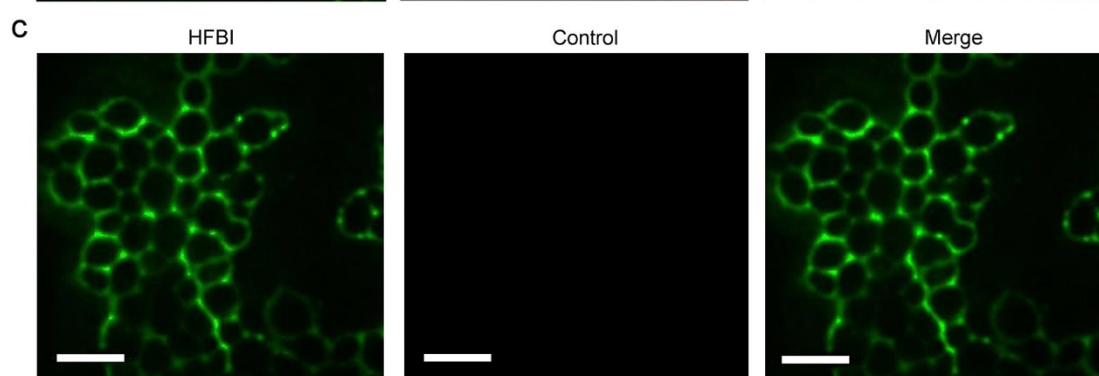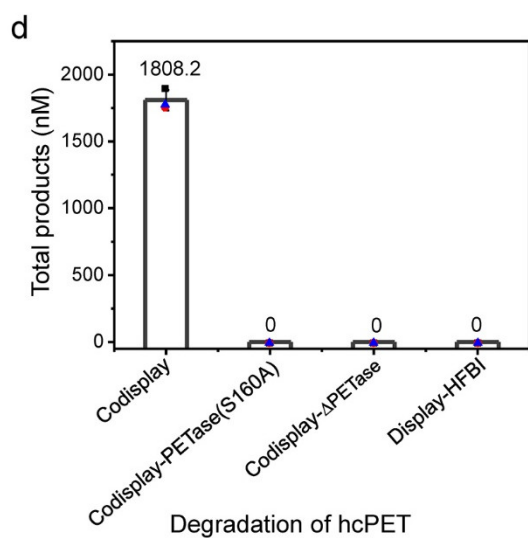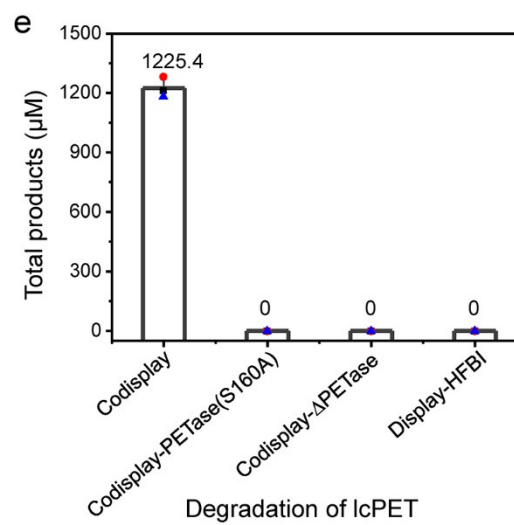

52 **Supplementary Fig. 8** Fluorescence microscopy of immuno-stained *P. pastoris* cells about **(a)**  
53 GS115/PETase(S160A)-HFBI, **(b)** GS115/ $\Delta$ PETase-HFBI and **(c)** GS115/HFBI-GCW61. All the  
54 experiments are repeated three times independently with similar results obtained. One representative is  
55 shown for **(a)** to **(c)**. (Scale bar: 10  $\mu$ m). The total products of hcPET **(d)** and lcPET **(e)** were degraded by  
56 the above three cells and GS115/PETase-HFBI. n=3 independent experiments. Data are presented as mean  
57 values +/- SD. Source data are provided as a Source Data file.

58

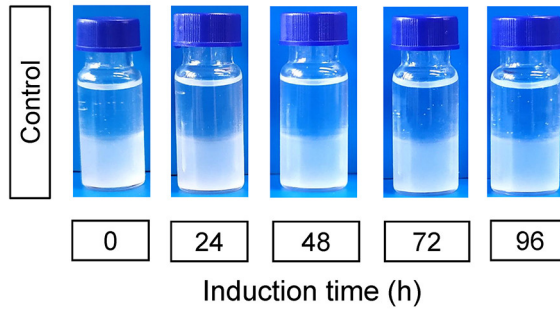

59

60 **Supplementary Fig. 9** The real shot of MATH experiment yeast cells displaying only PETase. All the  
61 experiments are repeated three times independently with similar results obtained. One representative is  
62 shown.

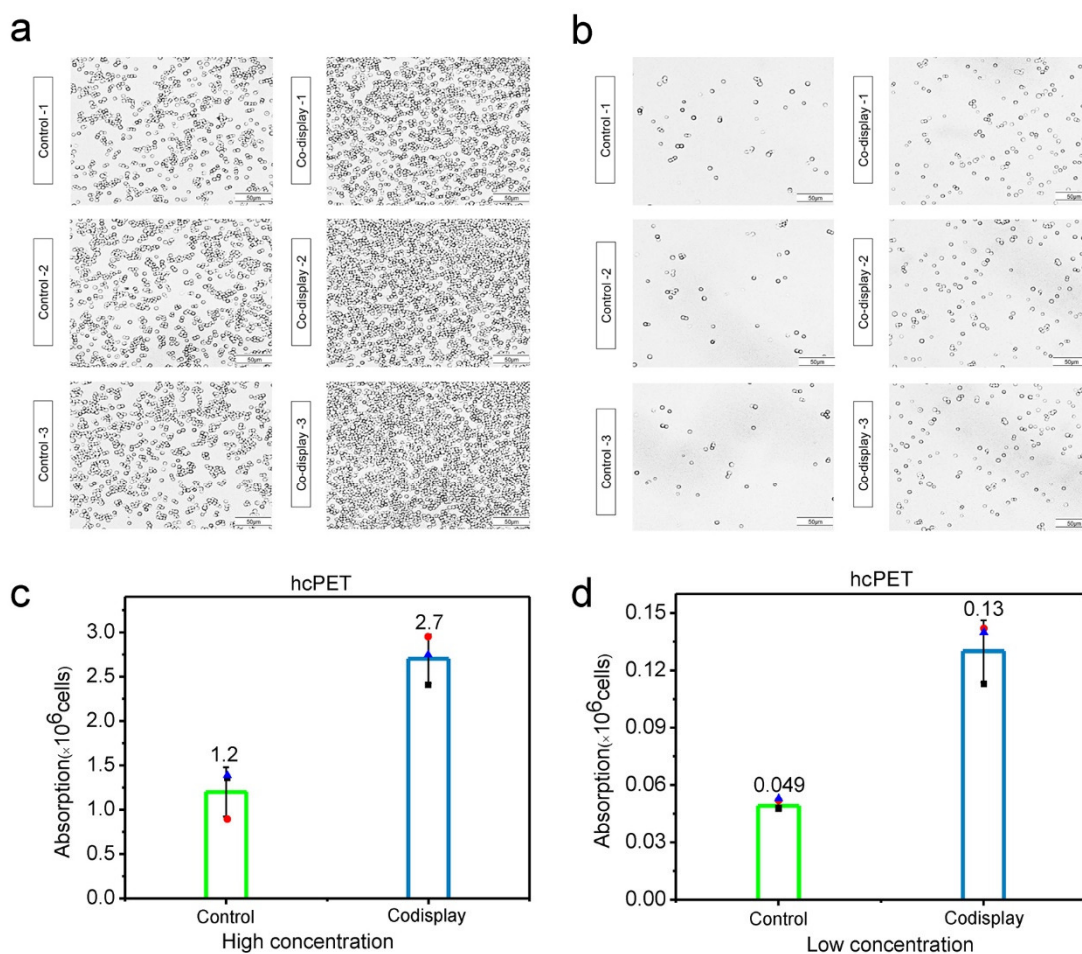

64 **Supplementary Fig. 10** The adsorption of the control sample-yeast cells displaying only PETase and the  
 65 codisplay cells on the hcPET surface **(a) & (c)** at high cell concentration; **(b) & (d)** at low cell concentration.  
 66 (Scale bar: 50  $\mu$ m). All the experiments are repeated three times independently with similar results obtained.  
 67 One representative is shown. Data are presented as mean values  $\pm$  SD. Source data are provided as a  
 68 Source Data file.

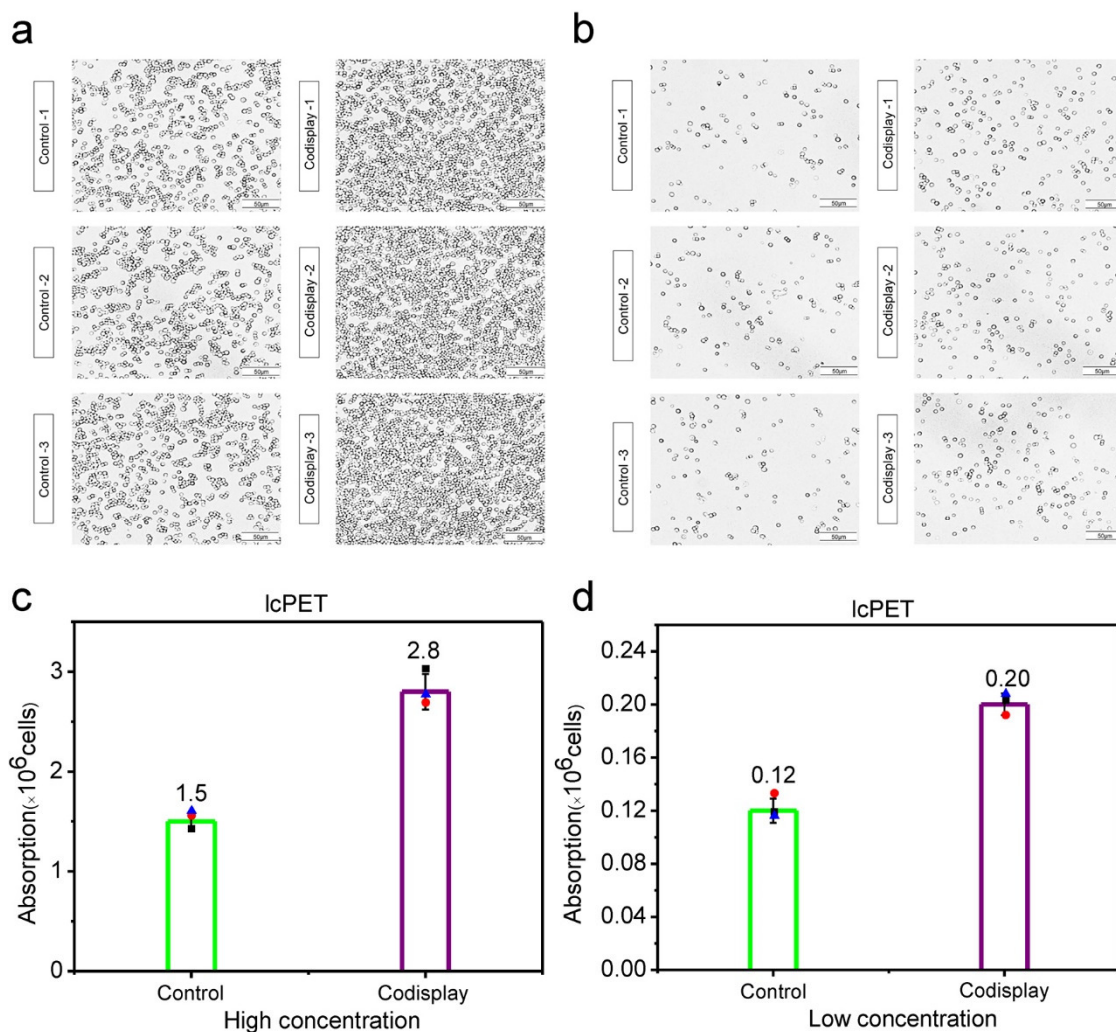

70 **Supplementary Fig. 11** The adsorption of the control sample-yeast cells displaying only PETase and the  
 71 codisplay cells on the lcPET surface **(a) & (c)** at high cell concentration; **(b) & (d)** at low cell concentration.  
 72 (Scale bar: 50  $\mu$ m). All the experiments are repeated three times independently with similar results obtained.  
 73 One representative is shown. Data are presented as mean values  $\pm$  SD. Source data are provided as a  
 74 Source Data file.  
 75

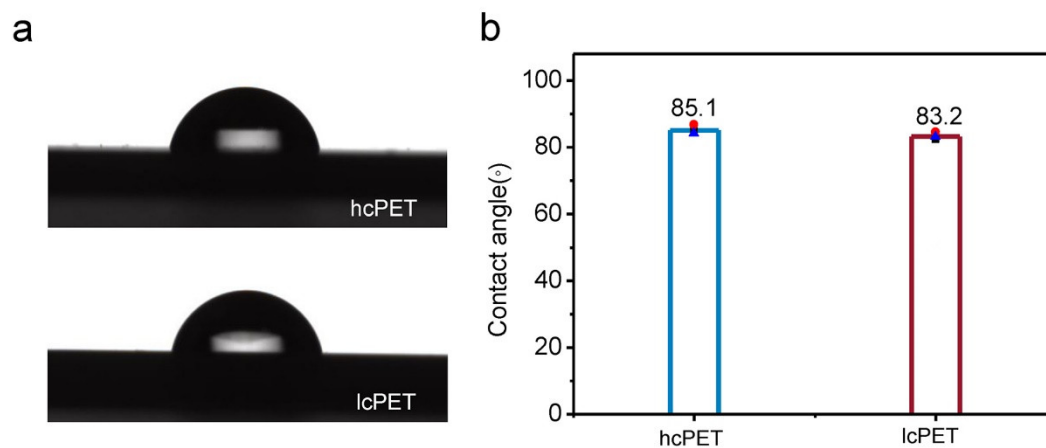

77 **Supplementary Fig. 12 Comparison of the hydrophobicity of PET films.** (a) WCA experiment on  
78 hcPET and lcPET to verify the hydrophobicity; (b) Measurement results of WCA. All the experiments are  
79 repeated three times independently with similar results obtained. One representative is shown. Data are  
80 presented as mean values  $\pm$  SD. Source data are provided as a Source Data file.

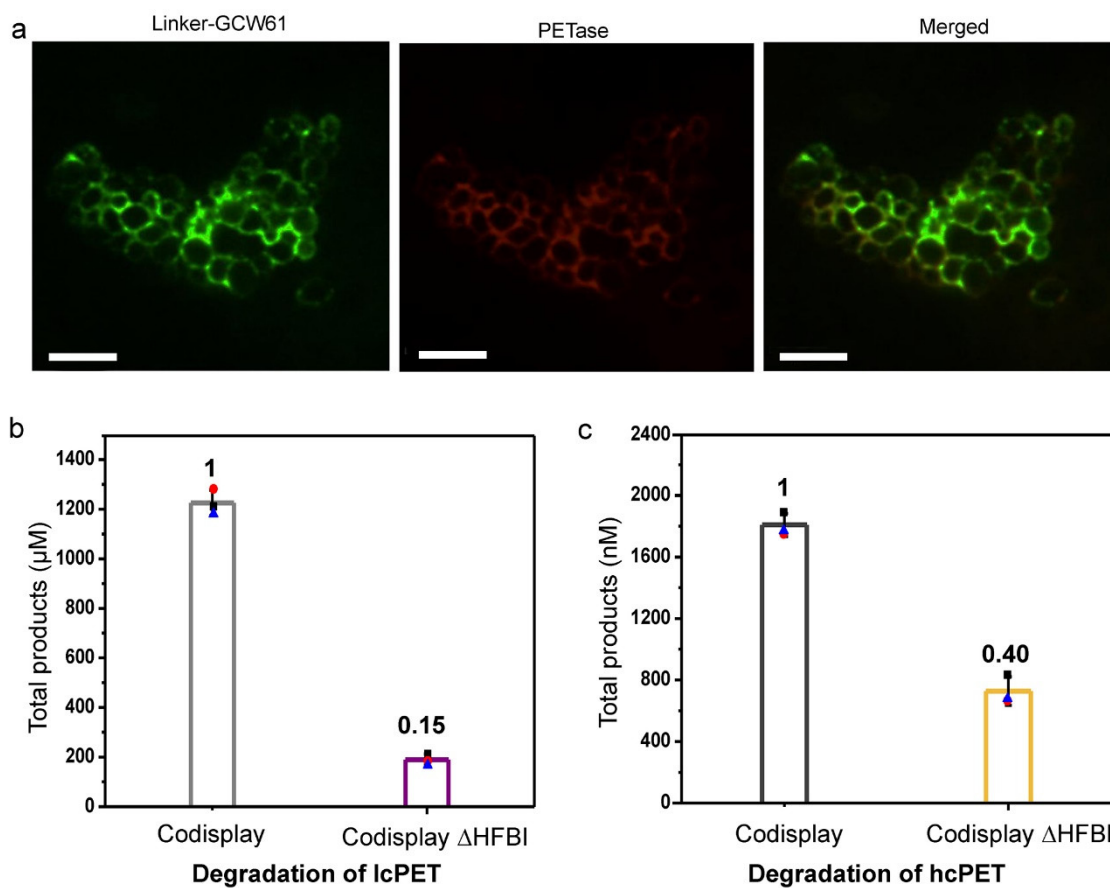

82 **Supplementary Fig. 13 Enzymatic activity assay of negative control GS115/PETase- $\Delta\text{HFBI}$  cells. (a)**  
 83 Fluorescence microscopy of immuno-stained *P. pastoris* cells about GS115/PETase- $\Delta\text{HFBI}$  cells. (Scale bar:  
 84 10  $\mu\text{m}$ ). The total products of lcPET (**b**) and hcPET (**c**) were hydrolyzed by control sample  
 85 GS115/PETase-HFBI cells and GS115/PETase- $\Delta\text{HFBI}$  cells. All the experiments are repeated three times  
 86 independently with similar results obtained. One representative is shown. Data are presented as mean values  
 87  $\pm$  SD. Source data are provided as a Source Data file.  
 88



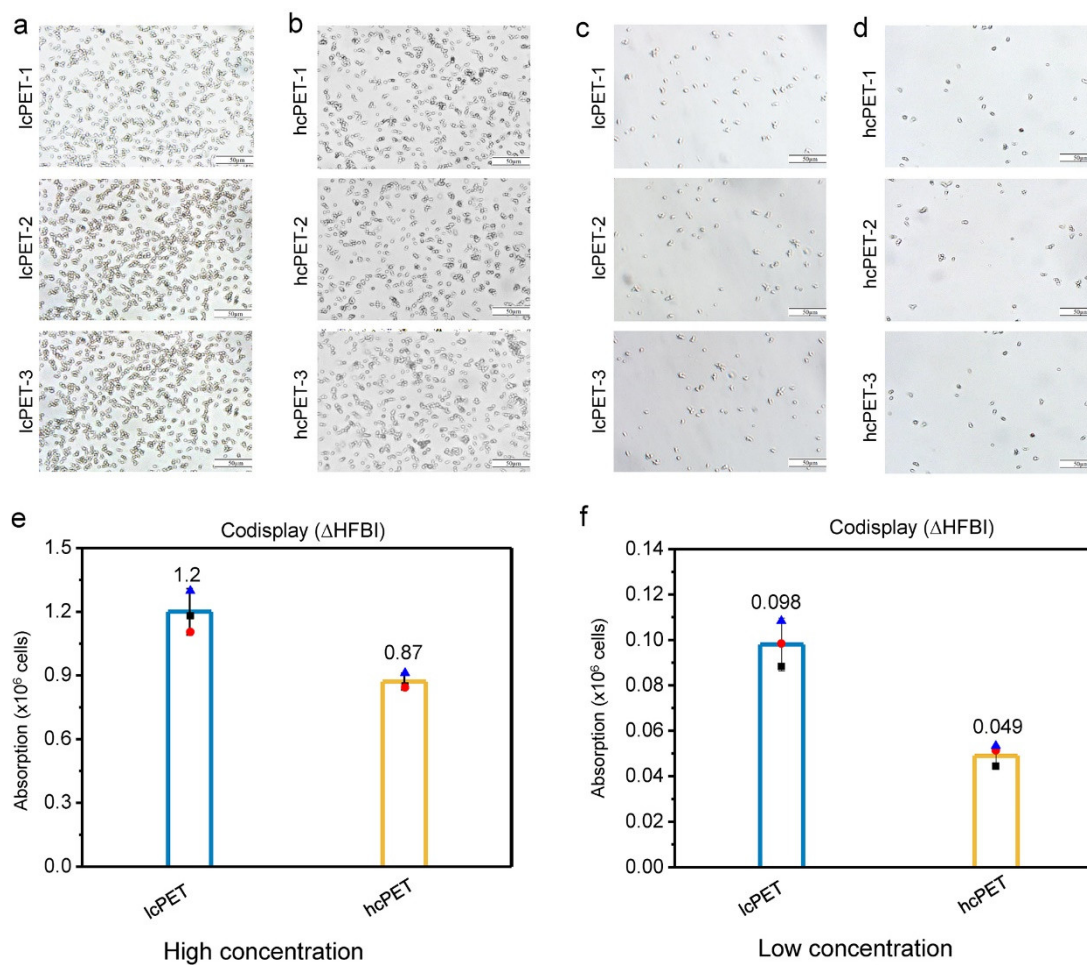

90 **Supplementary Fig. 14** The adsorption of the GS115/PETase- $\Delta$ HFBI cells on the lcPET and hcPET surface  
 91 at high cell concentration (a) & (b) & (e) and at low cell concentration (c) & (d) & (f). (Scale bar: 50  $\mu$ m).  
 92 All the experiments are repeated three times independently with similar results obtained. One representative  
 93 is shown. Data are presented as mean values +/- SD. Source data are provided as a Source Data file.



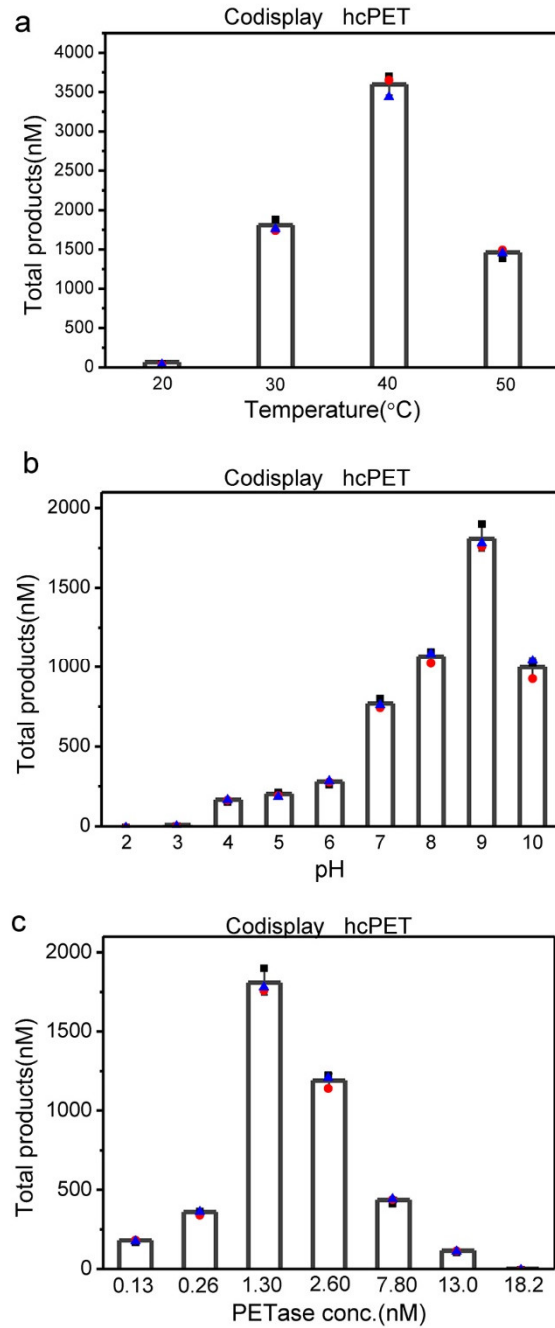

94

95 **Supplementary Fig. 15 The total products measurement for the optimized codisplay degradation**  
 96 **hcPET system. (a) Effect of temperature (b) pH and (c) protein concentration on PET hydrolysis. n=3**  
 97 **independent experiments. Data are presented as mean values +/- SD. Source data are provided as a Source**  
 98 **Data file.**

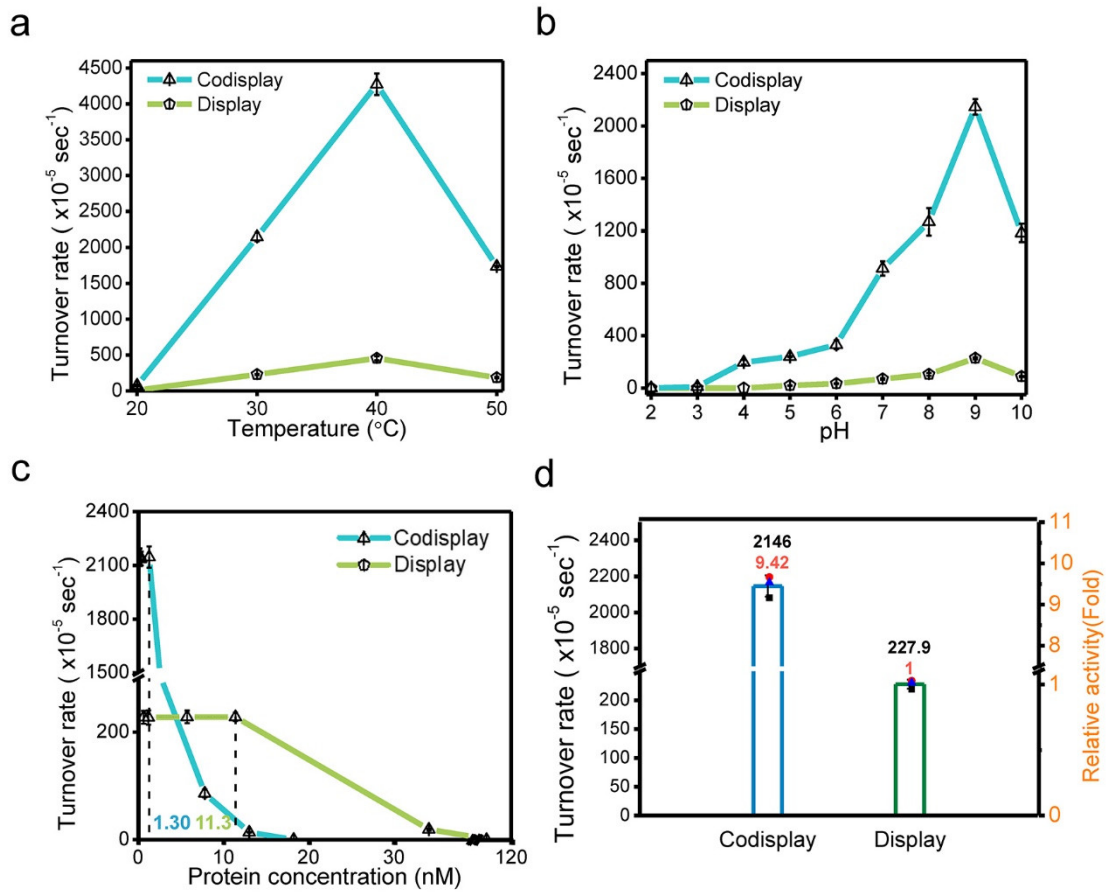

100 **Supplementary Fig. 16 Comparison of display and co-display systems. (a)** Effect of temperature **(b)** pH  
 101 and **(c)** protein concentration on PET hydrolysis. **(d)** Comparison of the turnover rates of codisplay cells and  
 102 display cells at the optimal condition using PET as a substrate. n=3 independent experiments. Data are  
 103 presented as mean values  $\pm$  SD. Source data are provided as a Source Data file.

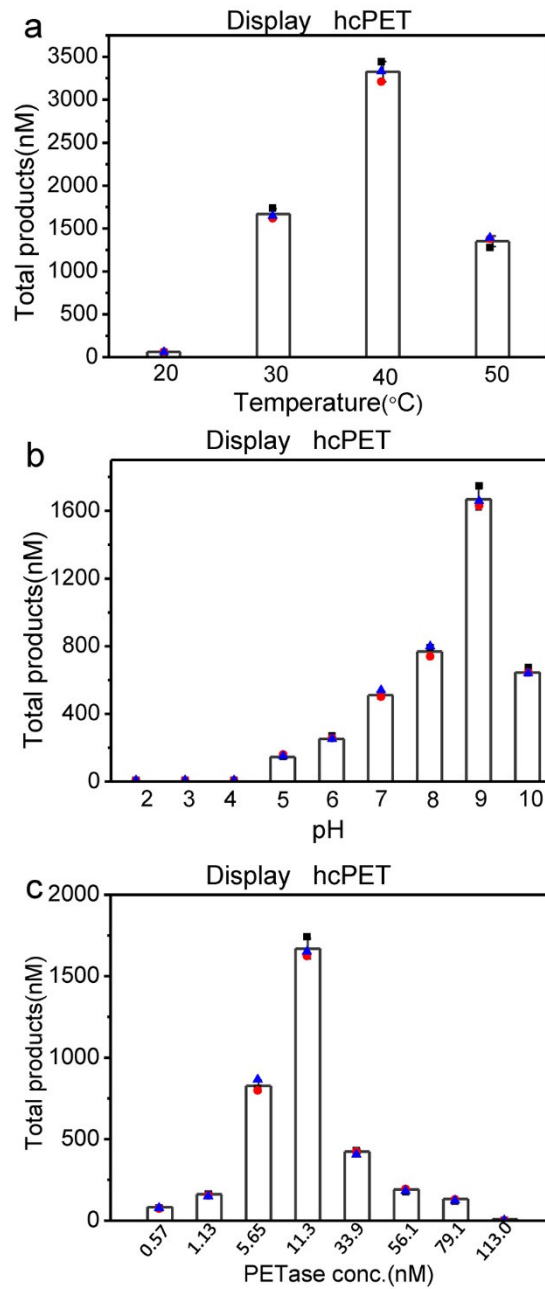

104

105 **Supplementary Fig. 17 The total products measurement for the optimized display degradation hcPET**

106 **system. (a) Effect of temperature (b) pH and (c) protein concentration on PET hydrolysis. n=3 independent**

107 **experiments. Data are presented as mean values +/- SD. Source data are provided as a Source Data file.**

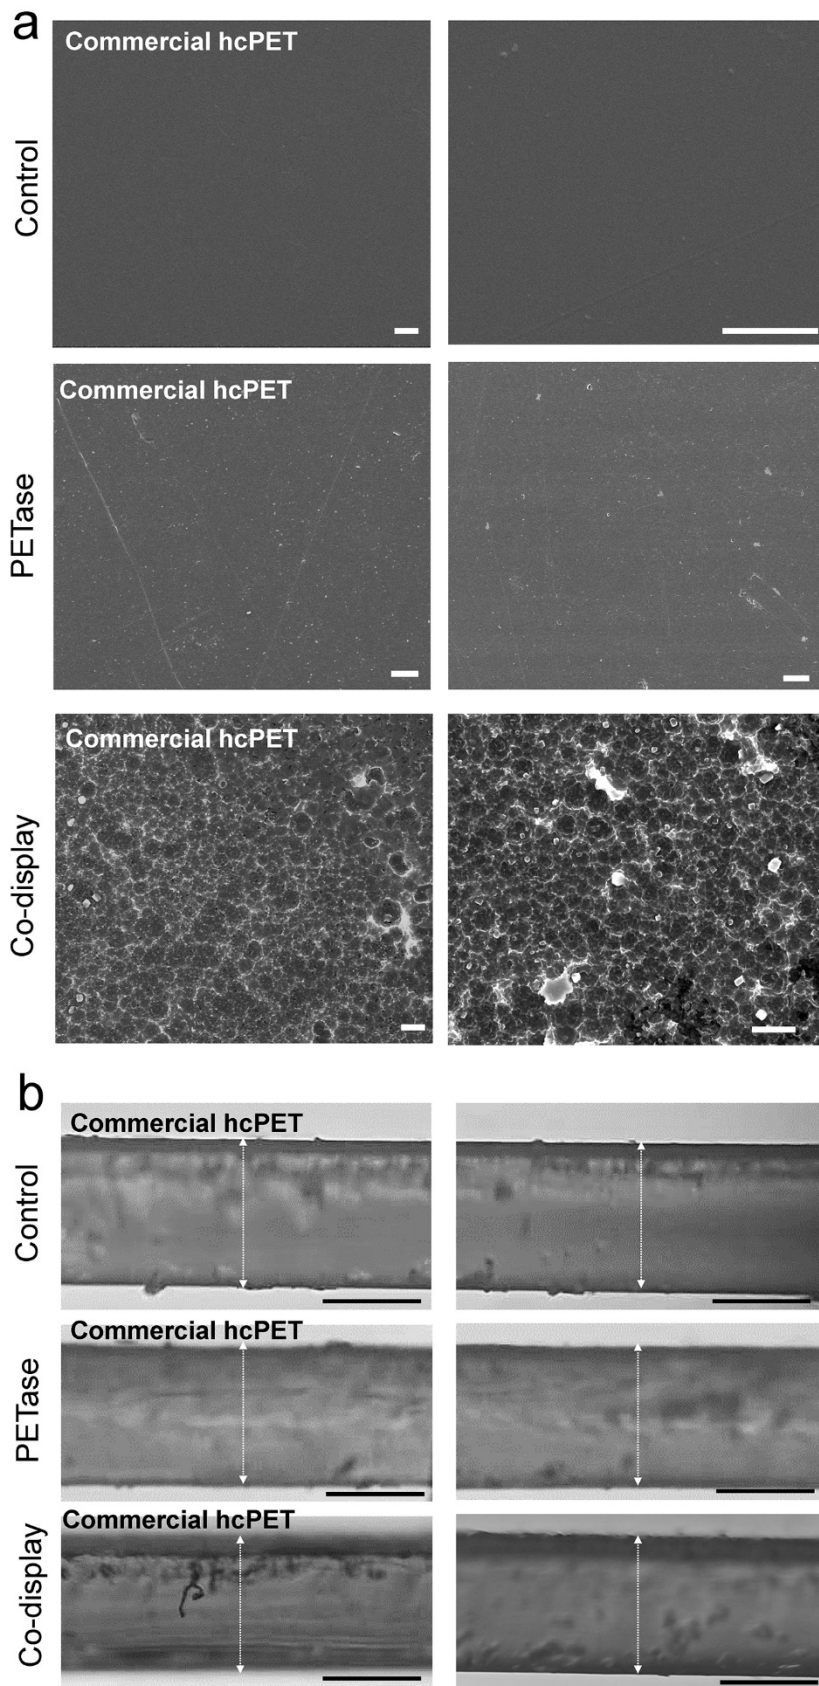

109 **Supplementary Fig. 18 Visualization of hcPET film degradation.** (a) SEM image of hcPET film before  
110 and after incubation with PETase and codisplay cells. (Scale bar: 5  $\mu\text{m}$ ) (b) Microscopic observation of  
111 cross-section of hcPET film before and after incubation with PETase and codisplay cells. (Scale bar: 100  
112  $\mu\text{m}$ ). All the experiments are repeated three times independently with similar results obtained.  
113

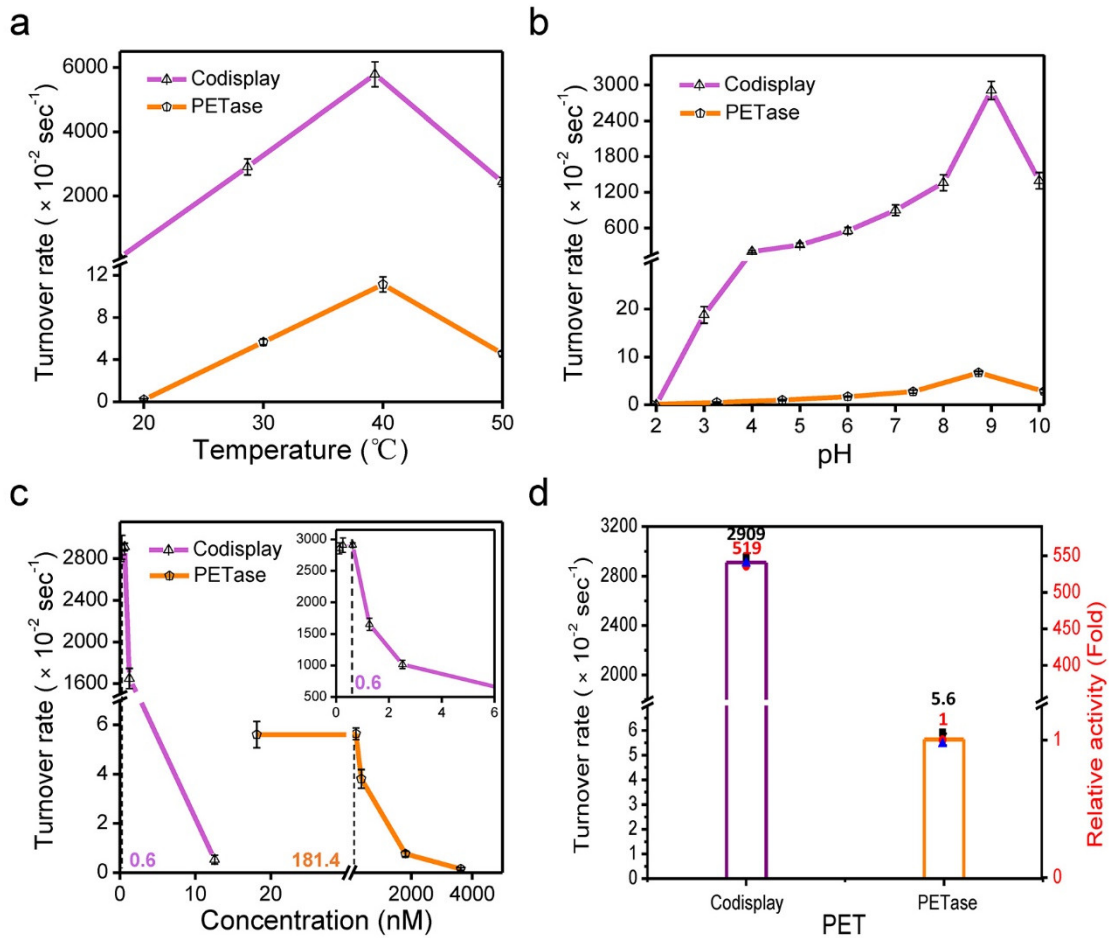

115 **Supplementary Fig. 19 Optimization of the degradation system. (a)** Effect of temperature **(b)** pH and **(c)**  
 116 protein concentration on lcPET hydrolysis. **(d)** Comparison of the turnover rates of codisplay cells and  
 117 PETase at the optimal condition using lcPET as substrate. n=3 independent experiments. Data are presented  
 118 as mean values +/- SD. Source data are provided as a Source Data file.  
 119

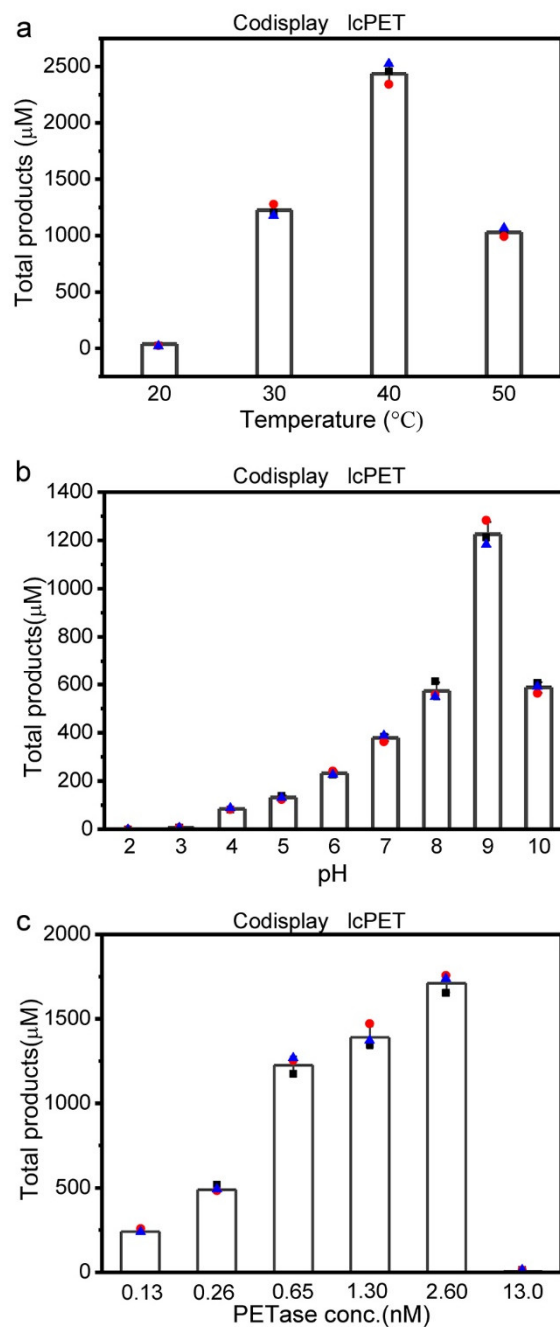

121

122 **Supplementary Fig. 20 The total products measurement for the optimized codisplay degradation**123 **lcPET system. (a) Effect of temperature (b) pH and (c) protein concentration on PET hydrolysis. n=3**

124 independent experiments. Data are presented as mean values +/- SD. Source data are provided as a Source

125 Data file.

126

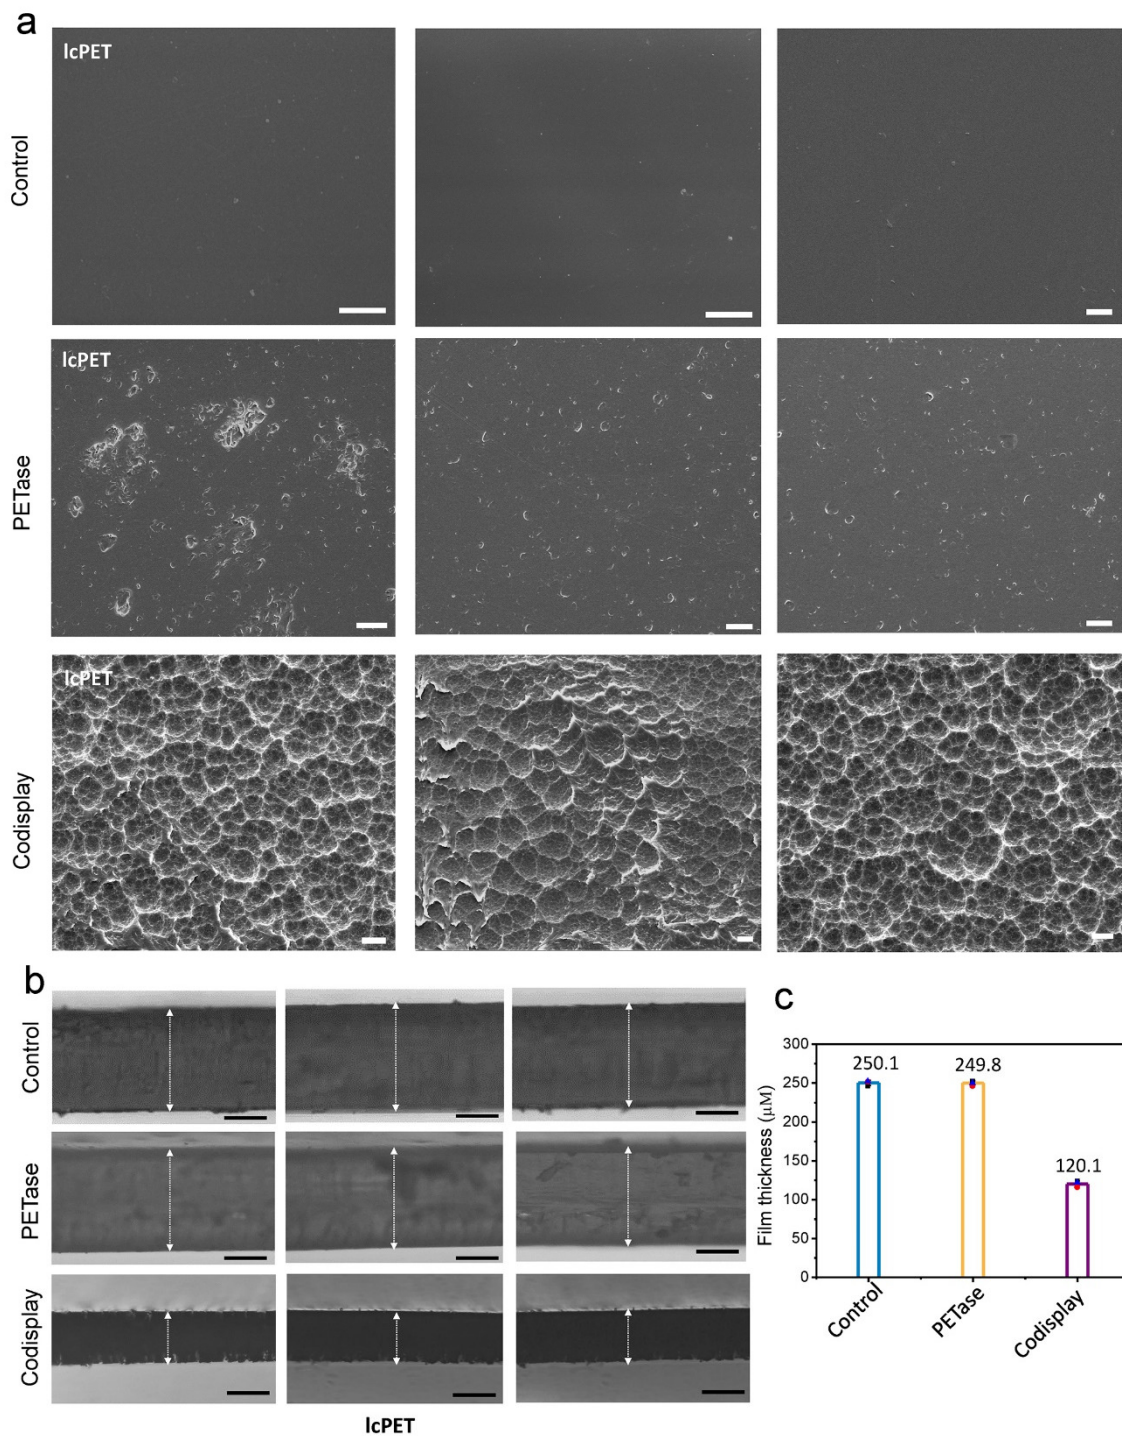

127

128 **Supplementary Fig. 21 Visualization of lcPET film degradation.** (a) SEM image of lcPET film before  
 129 and after incubation with PETase and codisplay cells. (Scale bar: 5 μm) (b) Microscopic observation of  
 130 cross-section of lcPET film before and after incubation with PETase and codisplay cells. (Scale bar: 100  
 131 μm). (c) Measurement of the cross-section. All the experiments are repeated three times independently with  
 132 similar results obtained. Data are presented as mean values +/- SD. Source data are provided as a Source  
 133 Data file.

134



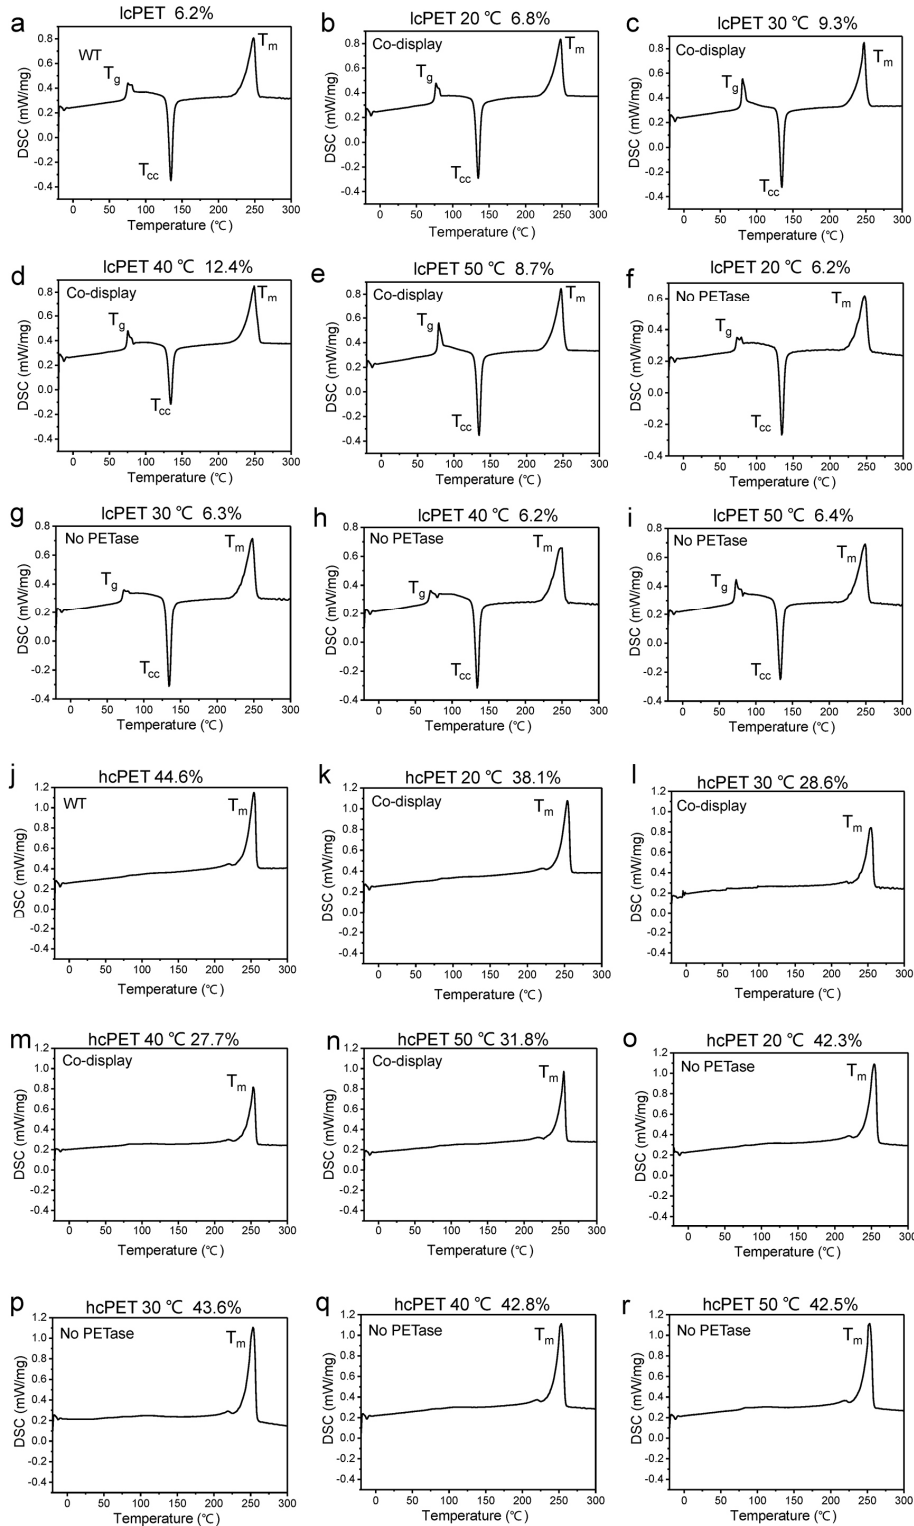

135

136 **Supplementary Fig. 22** The crystallinity of lcPET (a-i) and hcPET (j-r) before and after degradation at  
 137 different temperatures (20, 30, 40, and 50 °C) using the codisplay system. (a) The crystallinity of  
 138 commercial lcPET. (b-e) The crystallinity of lcPET after degradation at different temperatures (20, 30, 40,  
 139 and 50 °C) using the codisplay system. (f-i) The crystallinity of lcPET incubated at different temperatures

140 (20, 30, 40, and 50 °C). **(j)** The crystallinity of commercial hcPET. **(k-n)** The crystallinity of hcPET after  
141 degradation at different temperatures (20, 30, 40, and 50 °C) using the codisplay system. **(o-r)** The  
142 crystallinity of hcPET incubated at different temperatures (20, 30, 40, and 50 °C). All the experiments are  
143 repeated three times independently with similar results obtained. One representative is shown.  
144

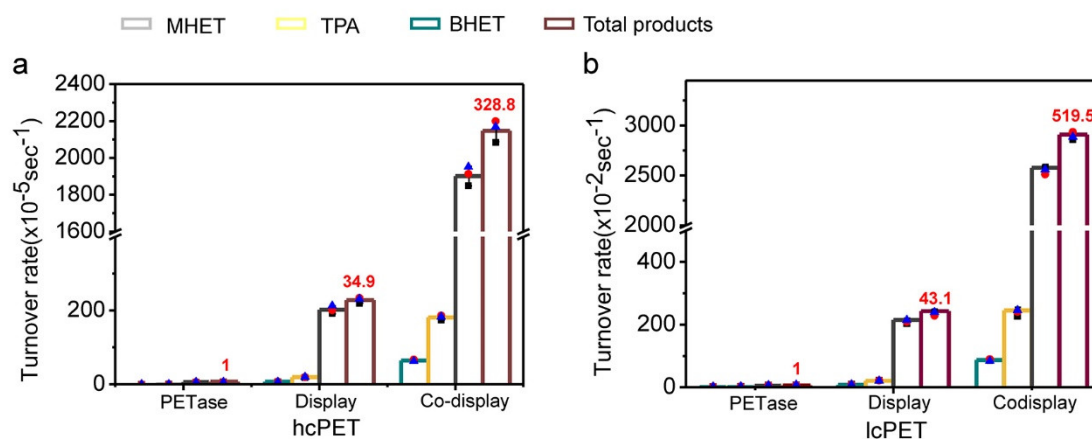

146 **Supplementary Fig. 23** Comparison of the turnover rates based on the total products of MHET, TPA and  
 147 BHET about purified PETase, display system and codisplay system at the optimal condition using lcPET **(a)**  
 148 and hcPET **(b)** as substrate. n=3 independent experiments. Data are presented as mean values +/- SD.  
 149 Source data are provided as a Source Data file.

150

151

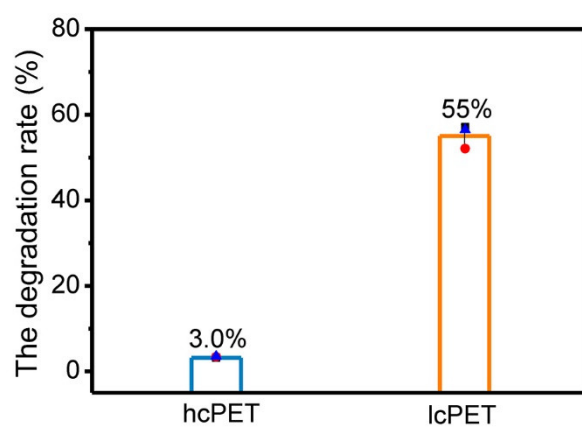

152

153 **Supplementary Fig. 24** The degradation rates of hcPET and lcPET within 18 h at 30 °C were about 3.0%  
154 and 55%, respectively. n=3 independent experiments. Data are presented as mean values +/- SD. Source  
155 data are provided as a Source Data file.

156

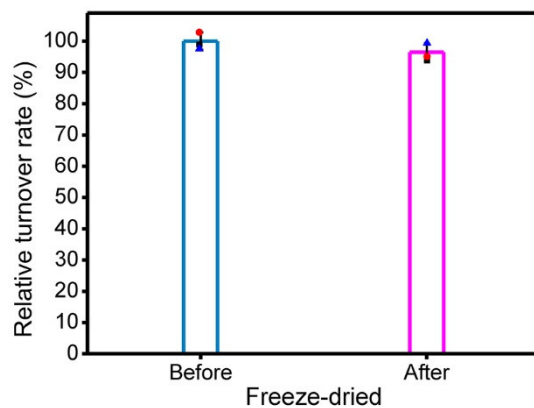

157

158 **Supplementary Fig. 25** The hydrolysis of PET film with the codisplay system did not change much before  
159 and after freeze-drying. n=3 independent experiments. Data are presented as mean values +/- SD. Source  
160 data are provided as a Source Data file.

161

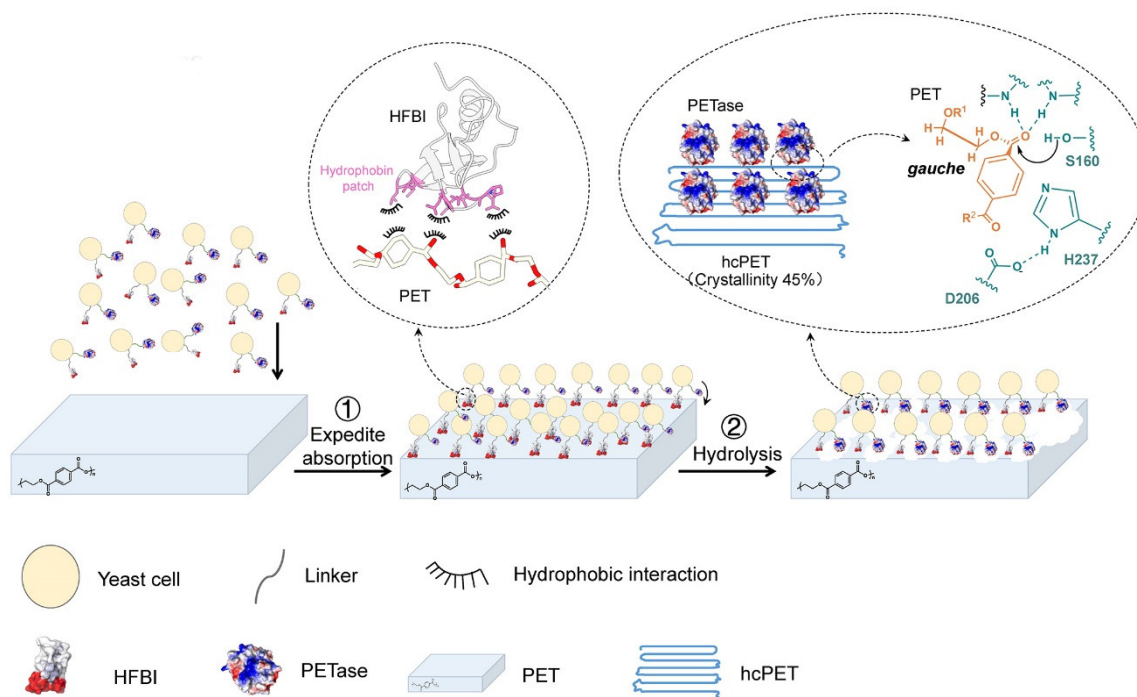

162

163 **Supplementary Fig. 26** Schematic diagram of hydrolysis of hcPET by codisplay system. Firstly, due to the  
 164 presence of HFBI, codisplayed cells quickly adsorbed to the hcPET surface, and the adsorption rate on the  
 165 hcPET surface was close to 100%. Secondly, PETase contacts the surface of high crystallinity PET, and  
 166 then hydrolyzes the PET chains, thus achieving the effect of efficient hydrolysis of high crystallinity PET.  
 167 Different figures are used in the illustration to represent different elements.

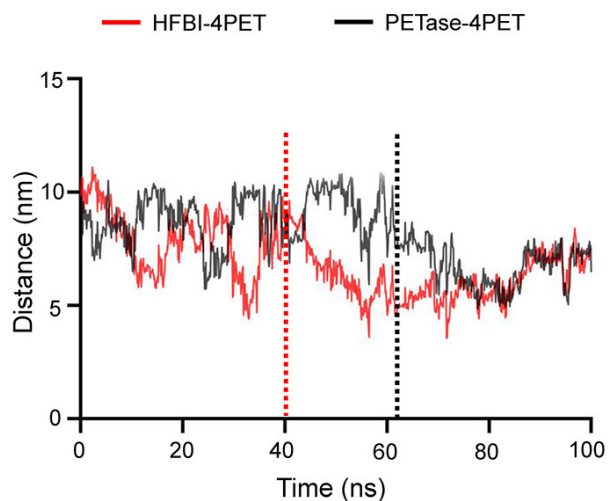

168

169 **Supplementary Fig. 27** The change of distance between 20 4PET molecules and proteins (black line:  
 170 PETase, red line: HFBI) in the GPI anchored system. The center of mass (COM) of each group were used in  
 171 the gmx distance measurement. Around 40 ns, 4PET adhered to HFBI and remain mostly attached for the  
 172 rest of the trajectory (red dash); at about 62 ns, 4PET came close to the catalytic triad of PETase (black  
 173 dash).

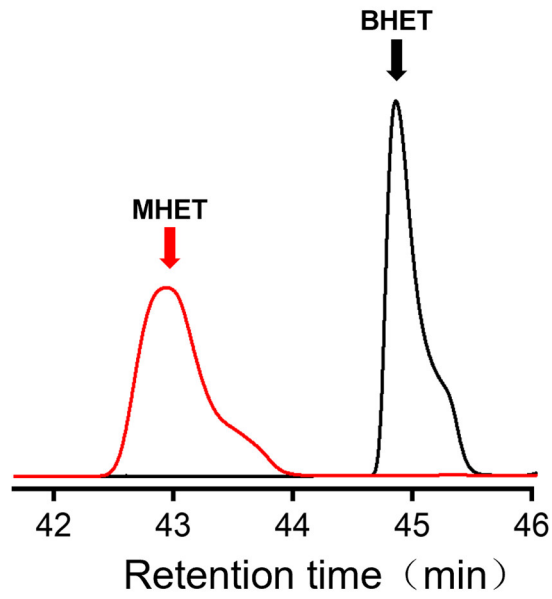

174

175 **Supplementary Fig. 28** HPLC analysis of BHET before (black curve) and after hydrolysis. BHET is  
176 hydrolyzed to generate MHET (red curve). The experiments are repeated three times independently with  
177 similar results obtained. One representative is shown.

178



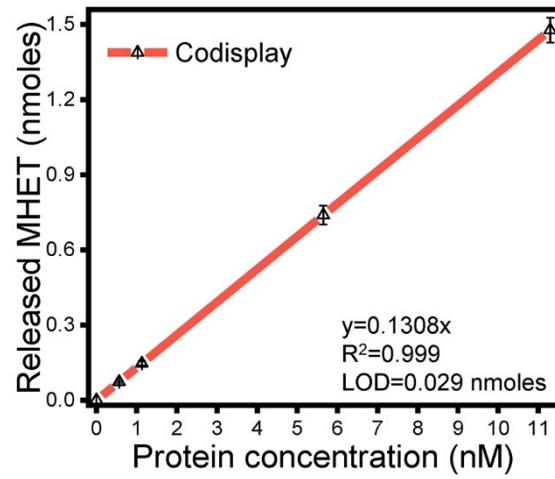

179

180 **Supplementary Fig. 29** The LOD of HPLC analysis. n=3 independent experiments. Data are presented as

181 mean values +/- SD. Source data are provided as a Source Data file.

182

183

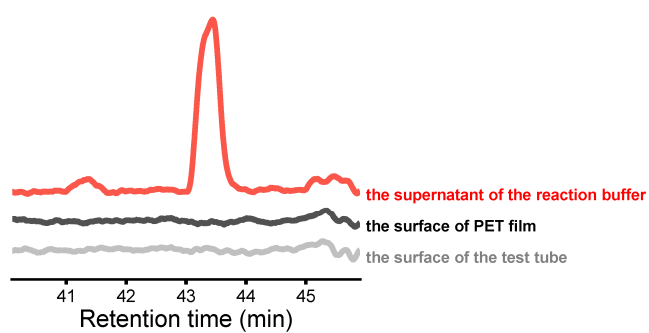

184

185 **Supplementary Fig. 30** The HPLC measurements of three locations for the major degradation product  
186 MHET. The red curve is used to represent the supernatant of the reaction buffer. The black curve is used to  
187 represent the surface of the PET film. The grey curve is used to represent the surface of the test tube. The  
188 experiments are repeated three times independently with similar results obtained. One representative is  
189 shown.

190

191 **Supplementary Sequence 1** The *petase* gene sequence

192 In this paper, the *petase* gene (GenBank number NZ\_BBYP01000074.1) was first  
193 optimized and synthesized by BGI Group (China).

194 ATGCAAACCAATCCTTATGCCCCGTGGTCCTAATCCTACCGCCGCGAGCTTAGA  
195 AGCAAGCGCCGGTCCTTTTACCGTTCGTAGCTTTACCGTTAGCCGCCCATCAG  
196 GTTATGGTGCCGGTACCGTTTACTATCCAACCAACGCCGGTGGTACCGTTGGT  
197 GCCATTGCCATTGTTCCAGGTTACACCGCCCCGTCAAAGCAGCATTAAAGTGGTG  
198 GGGTCCGCGTTTGGCCAGCCATGGTTTTTGTGTTATCACCATCGATACCAACA  
199 GCACCTTGGATCAACCAAGCAGCCGTAGCAGCCAACAAATGGCCGCCTTGCG  
200 TCAAGTTGCCAGCCTGAACGGTACTAGCAGCAGCCCAATTTACGGTAAGGTTG  
201 ATACCGCCCGTATGGGTGTTATGGGTGGAGCATGGGTGGTGGCGGTAGCTTG  
202 ATTAGCGCCGCCAACAACCAAGCTTGAAAGCCGCAGCACCACAAGCCCCAT  
203 GGGATAGCAGCACCAACTTTAGCAGCGTTACCGTTCCTACCTTGATTTTTGCC  
204 TGTGAGAACGATAGCATTGCCCCAGTTAACAGCAGCGCCTTGCCAATTTACGA  
205 TAGCATGAGCCGTAACGCCAAGCAATTCTTAGAAATCAACGGTGGTAGCCAT  
206 AGCTGTGCCAACAGCGGTAACAGCAACCAAGCCTTGATTGGTAAGAAAGGCG  
207 TTGCCTGGATGAAGCGTTTTATGGATAACGATACCCGTTACAGCACCTTTGCC  
208 TGTGAAAACCCAAACAGCACCCGTGTTAGCGATTTTCGTACCGCCAACCTGTAG  
209 CTGA

210 **Supplementary Table 1. X-ray data collection and refinement statistics**

|                                                     | PETase                                          | PETase-linker                                   |
|-----------------------------------------------------|-------------------------------------------------|-------------------------------------------------|
| <b>Data collection</b>                              |                                                 |                                                 |
| Space group                                         | <i>P2<sub>1</sub>2<sub>1</sub>2<sub>1</sub></i> | <i>P2<sub>1</sub>2<sub>1</sub>2<sub>1</sub></i> |
| Cell dimensions                                     |                                                 |                                                 |
| <i>a, b, c</i> (Å)                                  | 51.4, 55.5, 85.5                                | 50.8, 59.9, 77.4                                |
| $\alpha, \beta, \gamma$ (°)                         | 90, 90, 90                                      | 90, 90, 90                                      |
| Wavelength (Å)                                      | 0.97861                                         | 0.97864                                         |
| Resolution limit (Å)                                | 50.00-2.00 (2.03-2.00)*                         | 50.00-1.50 (1.54-1.50)*                         |
| <i>R</i> merge (%)                                  | 17.2 (>100)                                     | 19.4 (>100)                                     |
| <i>I</i> / $\sigma I$                               | 18.1 (2.9)                                      | 14.1 (4.1)                                      |
| Completeness (%)                                    | 99.7 (99.9)                                     | 98.6 (99.6)                                     |
| Redundancy                                          | 5.5 (5.5)                                       | 12.2 (9.7)                                      |
| <b>Refinement</b>                                   |                                                 |                                                 |
| Resolution range (Å)                                | 50.00-2.00                                      | 50.00-1.50                                      |
| No. reflections                                     | 16369 (1423)                                    | 37916(3634)                                     |
| <i>R</i> <sub>work</sub> / <i>R</i> <sub>free</sub> | 0.180/0.219                                     | 0.159/0.190                                     |
| NO. atoms                                           |                                                 |                                                 |
| Protein                                             | 1934                                            | 1959                                            |
| Ligand/ion                                          | 0                                               | 0                                               |
| Water                                               | 159                                             | 393                                             |
| B-factors                                           |                                                 |                                                 |
| Protein                                             | 30.22                                           | 12.62                                           |
| Ligand/ion                                          | /                                               | /                                               |
| Water                                               | 37.80                                           | 27.13                                           |
| <b>R.m.s deviations</b>                             |                                                 |                                                 |
| Bond lengths (Å)                                    | 0.009                                           | 0.009                                           |
| <b>Ramachandran statistics (%)</b>                  |                                                 |                                                 |
| Favored                                             | 96.93                                           | 98.13                                           |
| Allowed                                             | 3.07                                            | 1.87                                            |
| Outliers                                            | 0.00                                            | 0.00                                            |

212 **Supplementary Table 2** The yeast strains and plasmids used in this study

| Plasmids/yeast strains                            | Description                                                                                                                                                             |
|---------------------------------------------------|-------------------------------------------------------------------------------------------------------------------------------------------------------------------------|
| <b>Plasmids</b>                                   |                                                                                                                                                                         |
| pPIC9                                             | The yeast expression vector for cell surface display                                                                                                                    |
| pPICZ $\alpha$ A                                  | The yeast expression vector for cell surface display                                                                                                                    |
| pPIC9-PETase-GCW51                                | PETase and GCW51 fusion protein gene sequence expressed in pPIC9                                                                                                        |
| pPICZ $\alpha$ A-HFBI-GCW61                       | HFBI and GCW61 fusion protein gene sequence expressed in pPICZ $\alpha$ A                                                                                               |
| pPICZ $\alpha$ A-linker-GCW61                     | Linker and GCW61 fusion protein gene sequence expressed in pPICZ $\alpha$ A                                                                                             |
| <b>Strains</b>                                    |                                                                                                                                                                         |
| <i>P. pastoris</i><br>GS115                       | The methylotrophic yeast, capable of metabolizing methanol as individual sole carbon source; a mutation in the histidine dehydrogenase gene (HIS4); histidine auxotroph |
| <i>P. pastoris</i><br>GS115/PETase-GCW51          | GS115 strain harboring<br>pPIC9-PETase-GCW51                                                                                                                            |
| <i>P. pastoris</i><br>GS115/PETase-HFBI           | GS115 strain harboring<br>pPIC9-PETase-GCW51 and pPICZ $\alpha$ A-HFBI-GCW61                                                                                            |
| <i>P. pastoris</i><br>GS115/PETase- $\Delta$ HFBI | GS115 strain harboring<br>pPIC9-PETase-GCW51 and pPICZ $\alpha$ A-linker-GCW61                                                                                          |
| <i>P. pastoris</i><br>GS115/ $\Delta$ PETase-HFBI | GS115 strain harboring<br>pPIC9-linker-GCW51 and pPICZ $\alpha$ A-HFBI-GCW61                                                                                            |
| <i>P. pastoris</i><br>GS115/PETase(S160A)-HFBI    | GS115 strain harboring<br>pPIC9-PETase(S160A)-GCW51 and pPICZ $\alpha$ A-HFBI-GCW61                                                                                     |
| <i>P. pastoris</i><br>GS115/HFBI-GCW61            | GS115 strain harboring<br>pPICZ $\alpha$ A-linker-GCW61                                                                                                                 |

214 **Supplementary Table 3** The primers used for plasmid construction

| Primers                           | Sequences                                                     |
|-----------------------------------|---------------------------------------------------------------|
| 51-F                              | GGTGGTGGAGGTAGTGGAGGAGGTGGTAGTGATGACGATGACTCATTAC             |
| 51-R                              | CCGGAATTCCTAGATCAATAGGGCAATGG                                 |
| 61-F                              | GGTGGTGGAGGTAGTGGAGGAGGTGGTAGTAACAACCTATCAAACGAGAGT           |
| 61-R                              | ATAGTTTAGCGGCCGCTTAAATCAATAGAGCAACACCGGC                      |
| P-F                               | CCGCTCGAGAAAAGAGATTACAAGGATGACGACGATAAGCAAACCAATCCTTATGCCCGTG |
| P-R                               | ACTACCACCTCCTCCACTACCTCCACCACCGCTACAGTTGGCGGTACGAA            |
| hf-F                              | CCGGAATTC AACAGTGCACCACTGG                                    |
| hf-R                              | ACTACCACCTCCTCCACTACCTCCACCACCGACGTTAACCGGAACACATC            |
| ΔHFBI-F                           | CCGGAATTC CAT CAT CAC CAT CAC CATGGTGGTGGAGGTAGTGGAGG         |
| ΔHFBI-F                           | ATAAGAATGCGGCCGCTTAAATCAATAGAGCAACACCG                        |
| ΔPETase-F                         | CCGCTCGAGAAAAGAGATTACAAGGATGACGACGATAAGGGTGGTGGAGGTAGTGGAGG   |
| ΔPETase-R                         | CCGGAATTCCTAGATCAATAGGGCAATGGC                                |
| p51-F                             | GGAATTCATATGCAAACCAATCCTTATGCCCG                              |
| p51-R                             | CCGCTCGAGCTAGATCAATAGGGCAATGGCAAC                             |
| PL-F                              | GGAATTCATATGCAAACCAATCCTTATGCCCG                              |
| PL-R                              | CCGCTCGAGACTACCACCTCCTCCACTACCTCCA                            |
| PETase<br>(S160A)-F               | CCGCTCGAGAAAAGAGATTACAAGGATGACG                               |
| PETase<br>(S160A)                 | GTTATGGGTTGGGCCATGGGTGGTGG                                    |
| -overlap-F<br>PETase<br>(S160A)   | CCACCACCCATGGCCCAACCCATAAC                                    |
| -overlap-R<br>PETase<br>(S160A)-R | CCGGAATTCCTAGATCAATAGGGCAATGG                                 |

| Primers             | Sequences                                                      |
|---------------------|----------------------------------------------------------------|
| 51-F                | GGTGGTGGAGGTAGTGGAGGAGGTGGTAGTGATGACGATGACTCATTAC              |
| 51-R                | CCGGAATTCCTAGATCAATAGGGCAATGG                                  |
| 61-F                | GGTGGTGGAGGTAGTGGAGGAGGTGGTAGTAACAACCTATCAAACGAGAGT            |
| 61-R                | ATAGTTTAGCGGCCGCTTAAATCAATAGAGCAACACCGGC                       |
| P-F                 | CCGCTCGAGAAAAGAGATTACAAGGATGACGACGATAAGCAAACCAATCCTTATGCCCCGTG |
| P-R                 | ACTACCACCTCCTCCACTACCTCCACCACCGCTACAGTTGGCGGTACGAA             |
| hf-F                | CCGGAATTCACACAGTGCACCACTGG                                     |
| hf-R                | ACTACCACCTCCTCCACTACCTCCACCACCGACGTTAACCGGAACACATC             |
| ΔHFBI-F             | CCGGAATTCAT CAT CAC CAT CAC CATGGTGGTGGAGGTAGTGGAGG            |
| ΔHFBI-F             | ATAAGAATGCGGCCGCTTAAATCAATAGAGCAACACCG                         |
| ΔPETase-F           | CCGCTCGAGAAAAGAGATTACAAGGATGACGACGATAAGGGTGGTGGAGGTAGTGGAGG    |
| ΔPETase-R           | CCGGAATTCCTAGATCAATAGGGCAATGGC                                 |
| PETase<br>(S160A)-F | CCGCTCGAGAAAAGAGATTACAAGGATGACG                                |
| PETase<br>(S160A)   | GTTATGGGTTGGGCCATGGGTGGTGG                                     |
| -overlap-F          |                                                                |
| PETase<br>(S160A)   | CCACCACCCATGGCCCAACCCATAAC                                     |
| -overlap-R          |                                                                |
| PETase<br>(S160A)-R | CCGGAATTCCTAGATCAATAGGGCAATGG                                  |
| p51-F               | GGAATTCATATGCAAACCAATCCTTATGCCCCG                              |
| p51-R               | CCGCTCGAGCTAGATCAATAGGGCAATGGCAAC                              |
| PL-F                | GGAATTCATATGCAAACCAATCCTTATGCCCCG                              |
| PL-R                | CCGCTCGAGACTACCACCTCCTCCACTACCTCCA                             |
