# Supplementary material for: Biodegradation of highly crystallized poly(ethylene terephthalate) through cell surface codisplay of bacterial PETase and hydrophobin
Source: PubMed Central journal article supplement (PMC9681837; doi:10.1038/s41467-022-34908-z), 2022-11-21
Supplement: 41467_2022_34908_MOESM3_ESM.pdf [file 41467_2022_34908_MOESM3_ESM.pdf]

## **Description of Additional Supplementary Files**

**Supplementary Movie 1.** MD simulation video of the dynamic process of PET adsorption by the HFBI displayed system.

**Supplementary Movie 2.** MD simulation video of the dynamic process of PET adsorption by the co-display system.
